# Supplementary material for: Effects of Wait Times on Treatment Adherence and Clinical Outcomes in Patients With Severe Sleep-Disordered Breathing: A Secondary Analysis of a Noninferiority Randomized Clinical Trial
Source: PubMed Central journal article supplement (PMC7171552; doi:10.1001/jamanetworkopen.2020.3088), 2020-04-20

## Supplementary Online Content

Thornton CS, Tsai WH, Santana MJ, et al. Effects of wait times on treatment adherence and clinical outcomes in patients with severe sleep-disordered breathing: a secondary analysis of a noninferiority randomized clinical trial. *JAMA Netw Open*. 2020;3(4):e203088.  
doi:10.1001/jamanetworkopen.2020.3088

### **eFigure.** Overview of Study Design

This supplementary material has been provided by the authors to give readers additional information about their work.

**eFigure.** Overview of Study Design. Figure modified from Ip-Buting, et al (12). Total of 156 patients with 75 in the sleep physician arm and 81 in the alternative care provider (ACP) arm.

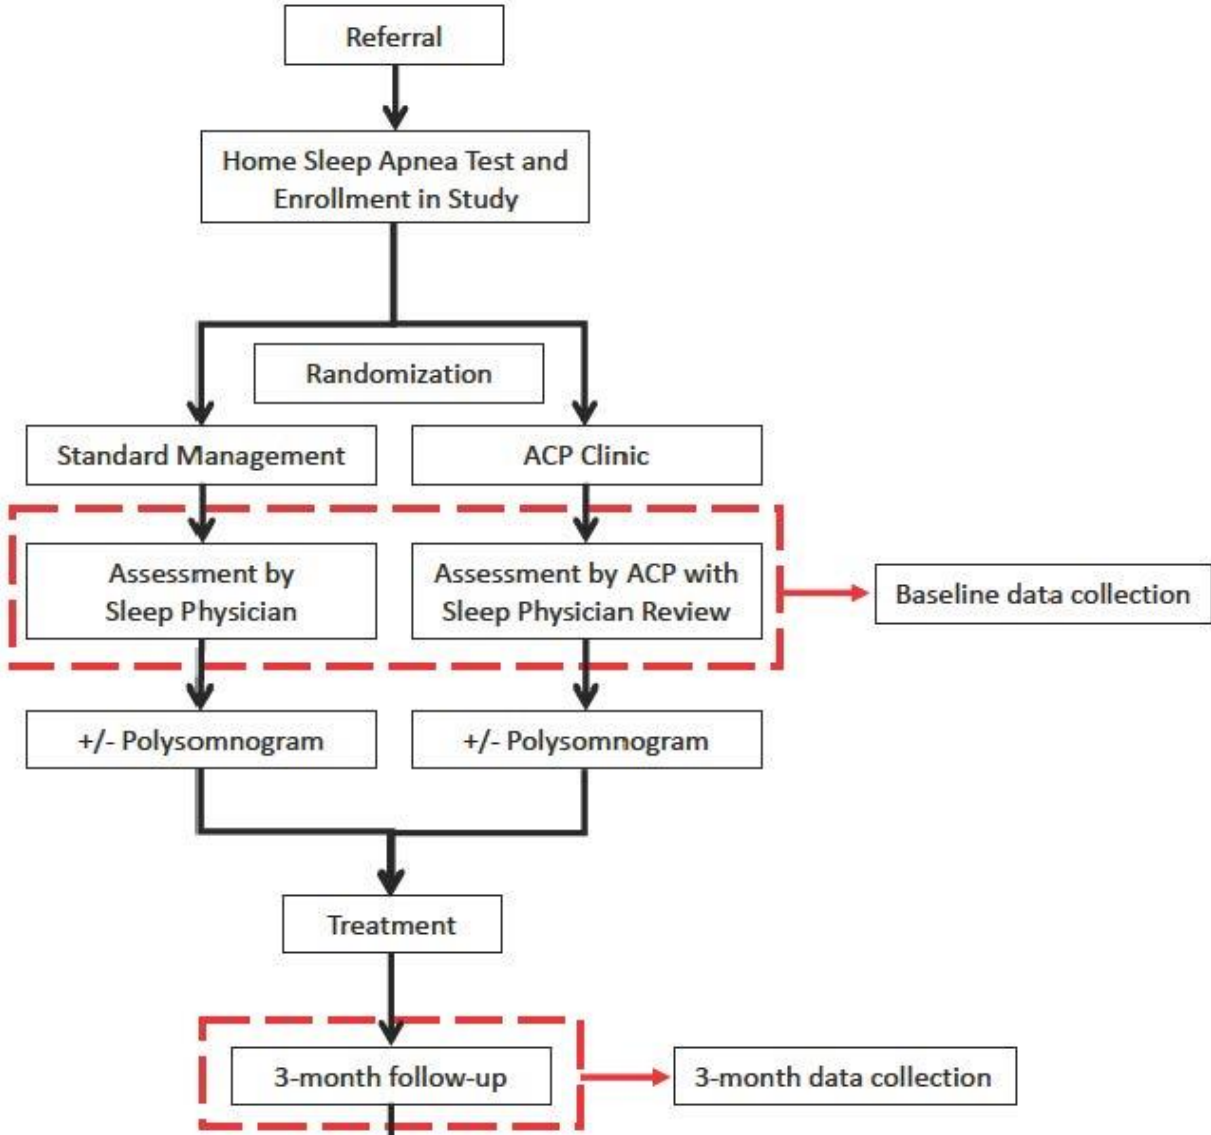

Supplement: jamanetwopen-3-e203088-s002.pdf [file jamanetwopen-3-e203088-s002.pdf]
